# Supplementary material for: Rat PRDM9 shapes recombination landscapes, duration of meiosis, gametogenesis, and age of fertility
Source: PubMed Central journal article supplement (PMC8082845; doi:10.1186/s12915-021-01017-0), 2021-04-28
Supplement: 12915_2021_1017_MOESM1_ESM.pdf [file 12915_2021_1017_MOESM1_ESM.pdf]

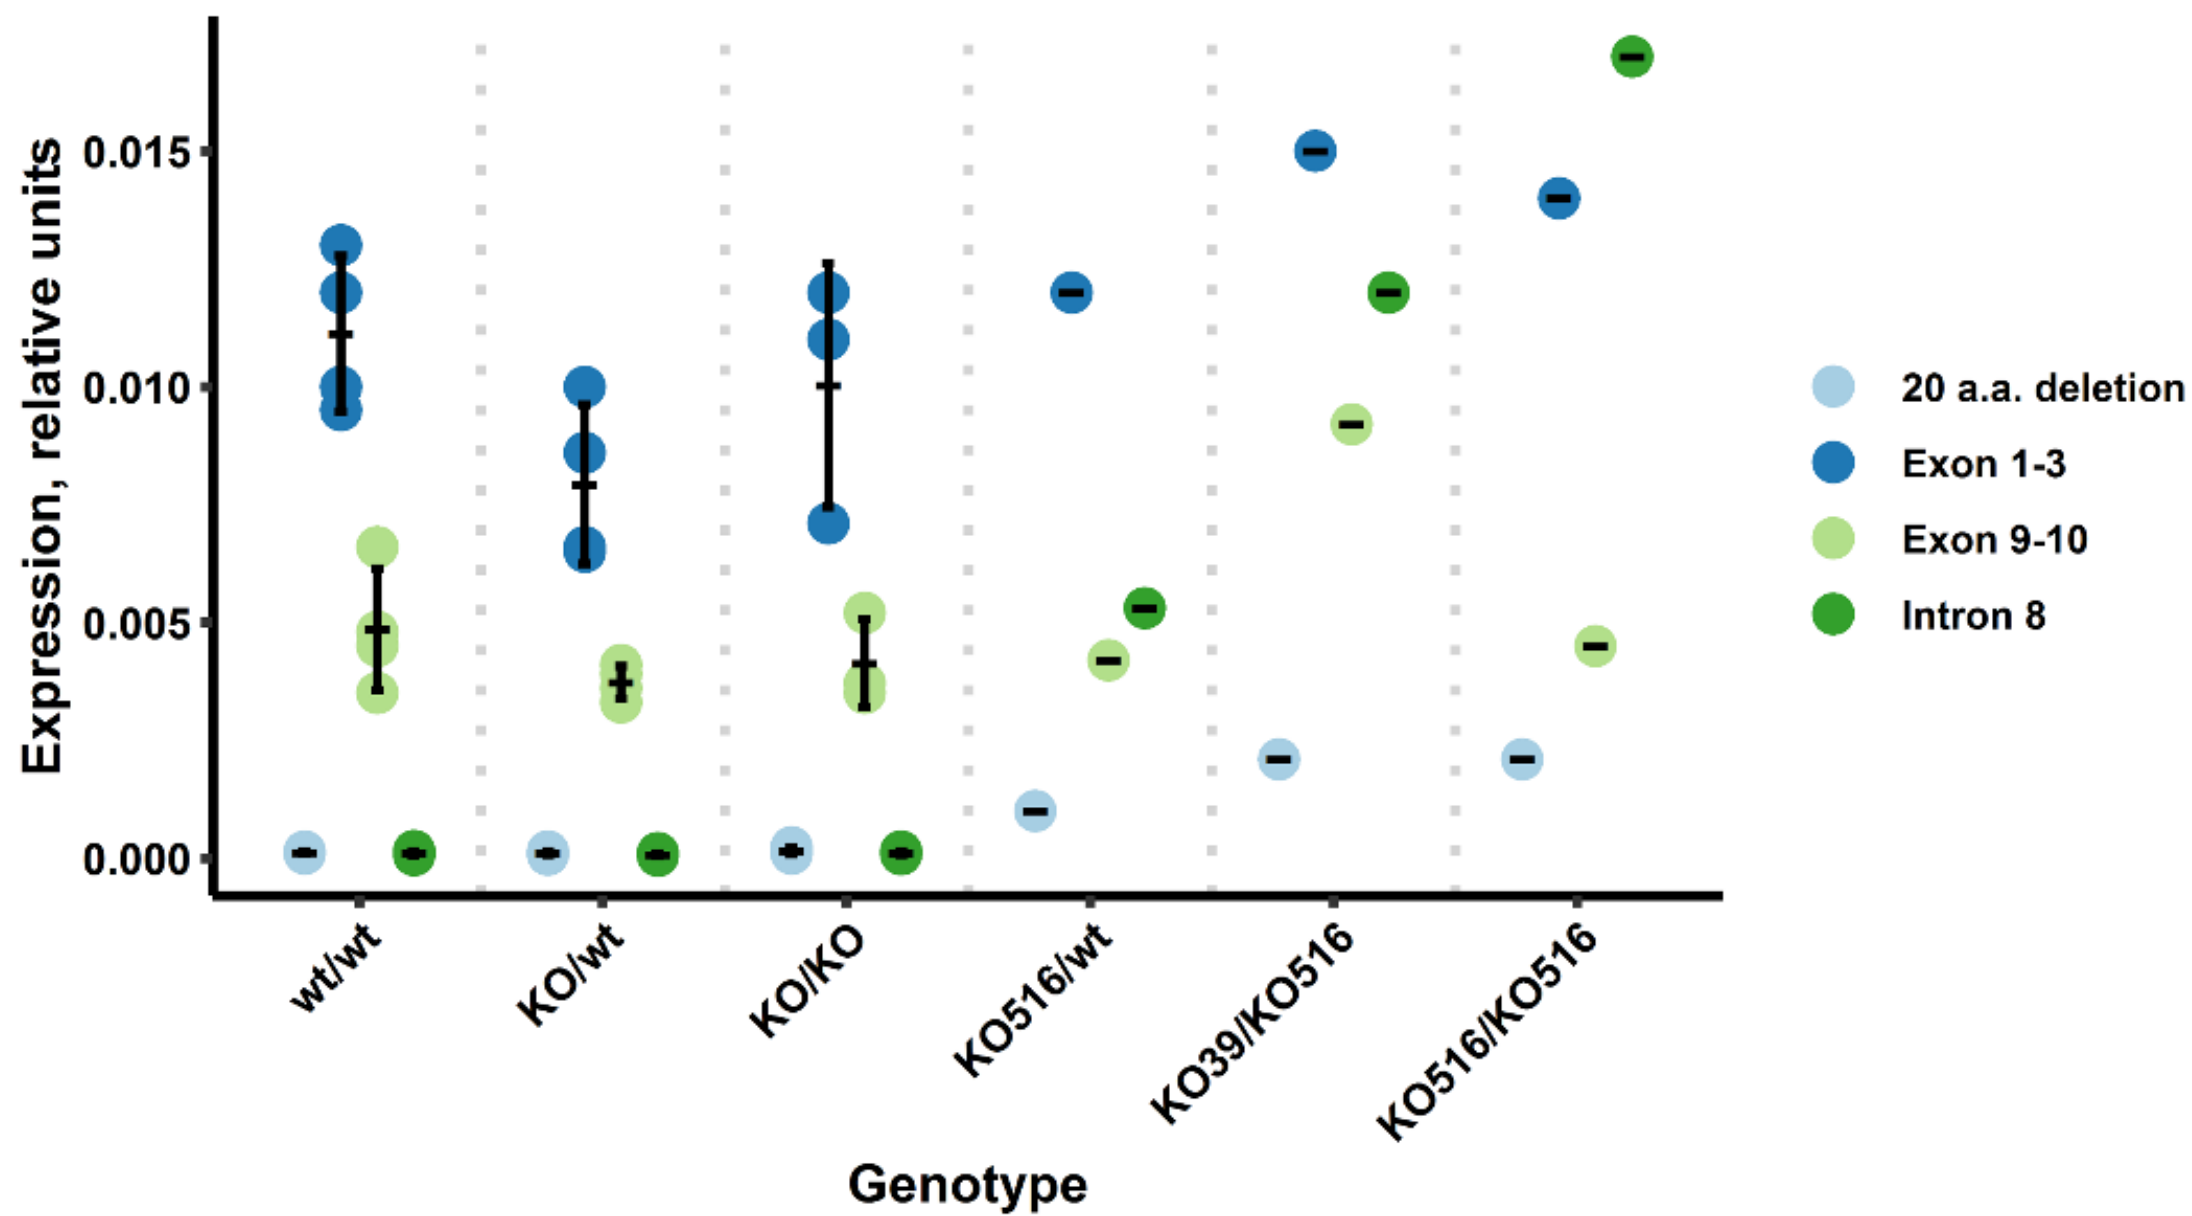

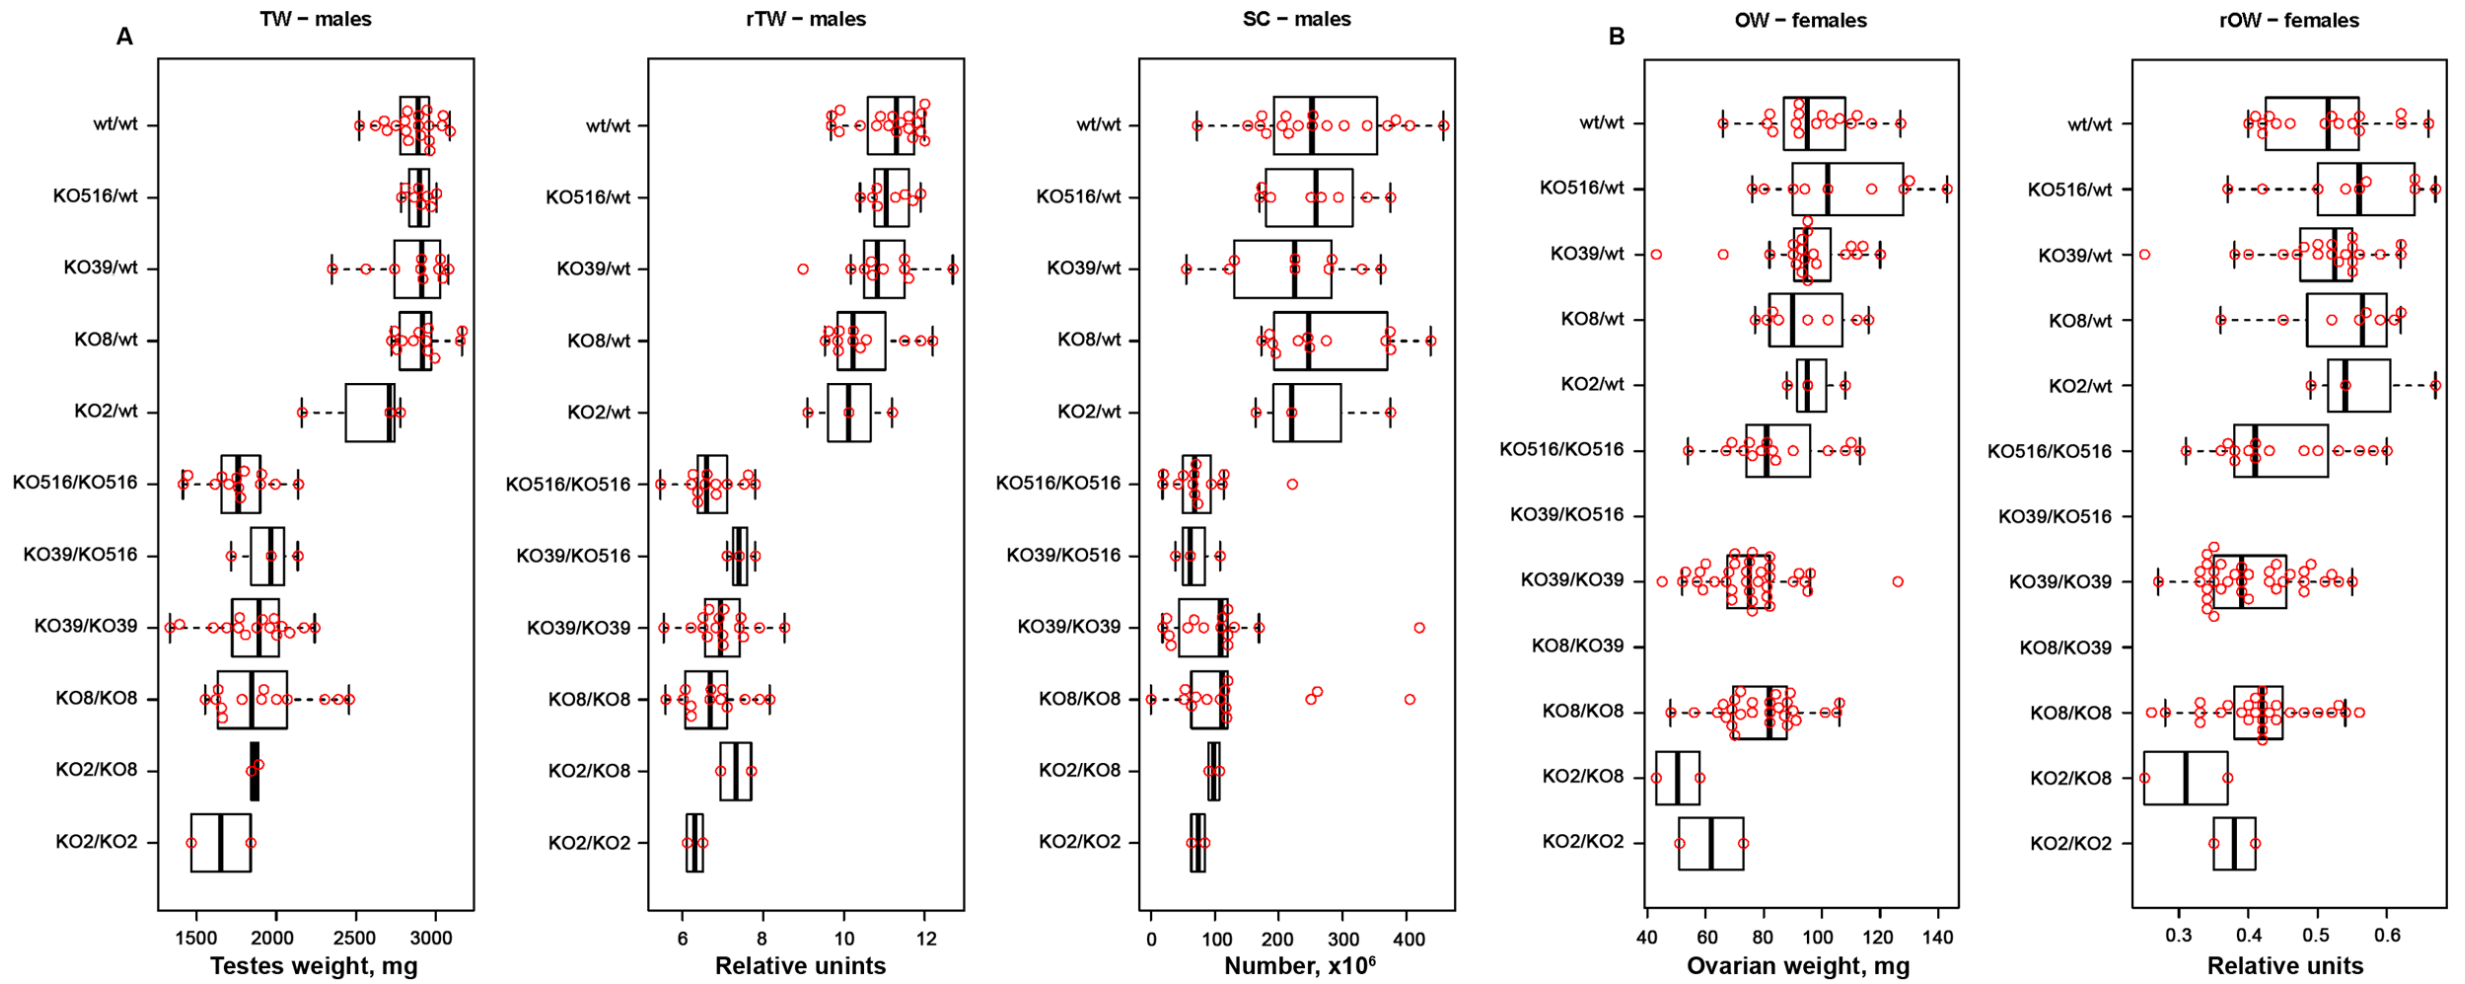

*Prdm9*<sup>wt/wt</sup>

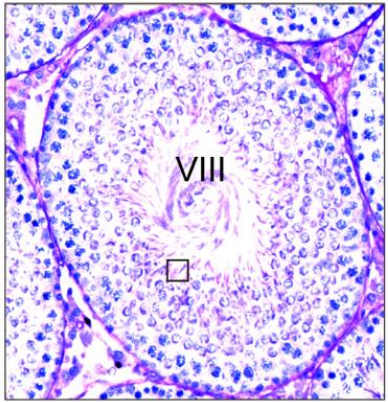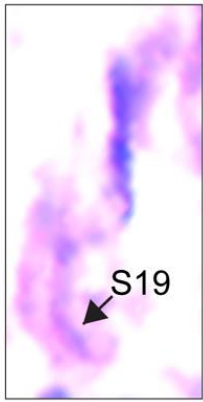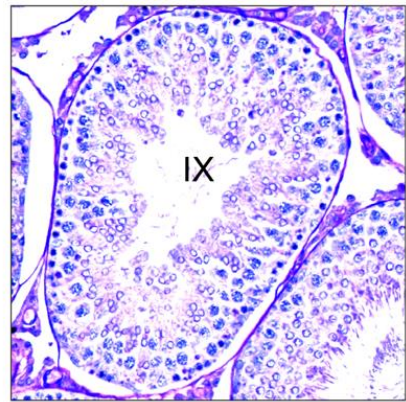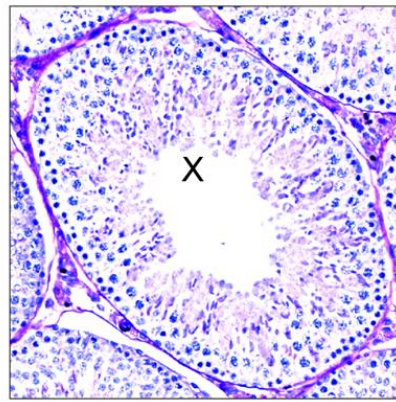

*Prdm9*<sup>KO/KO</sup>

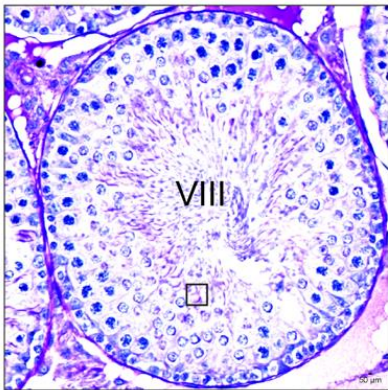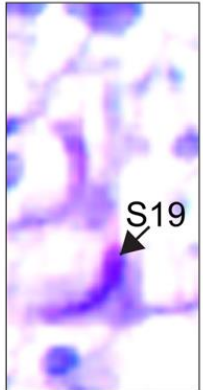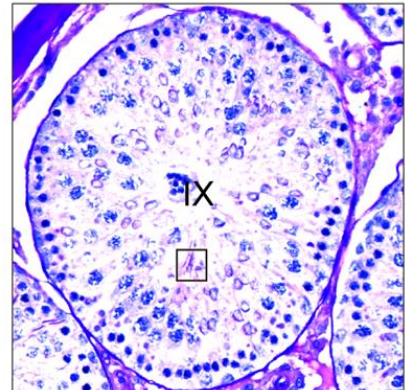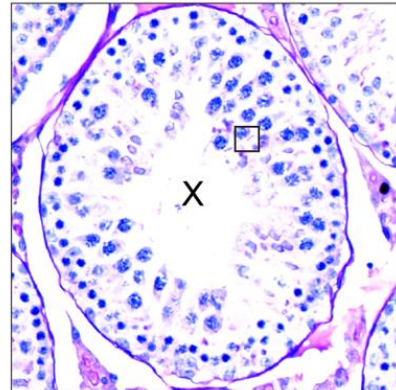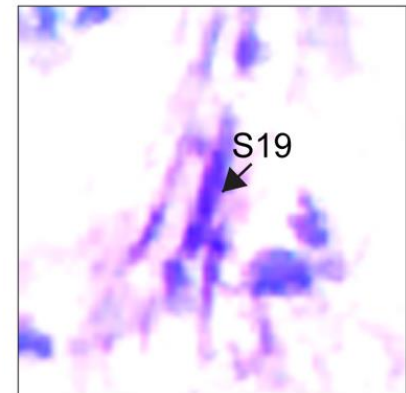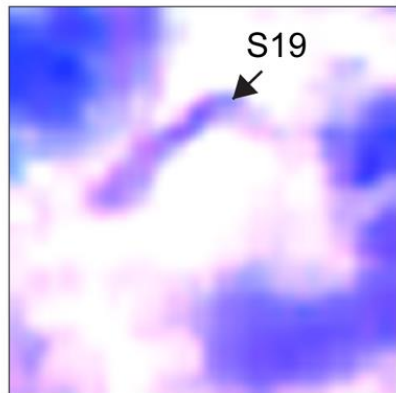

PWD-Prdm9<sup>wt/wt</sup>

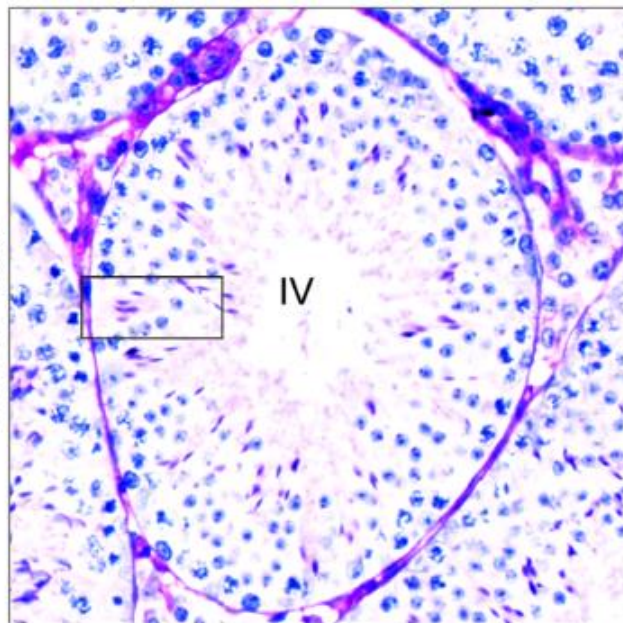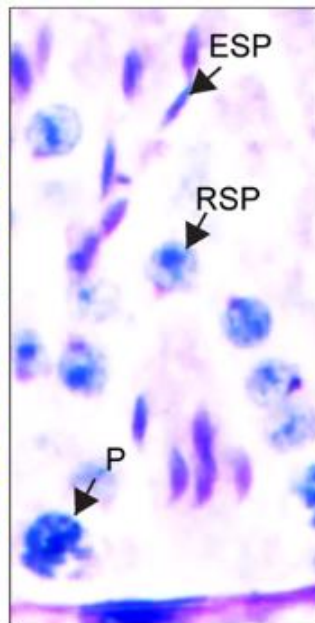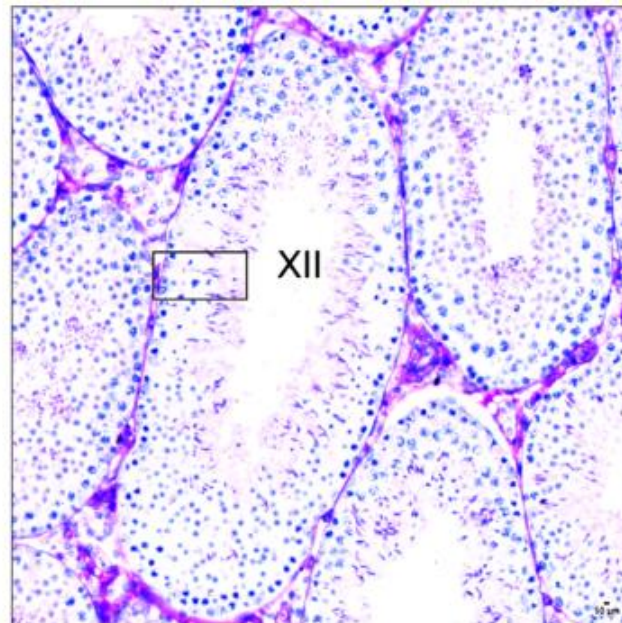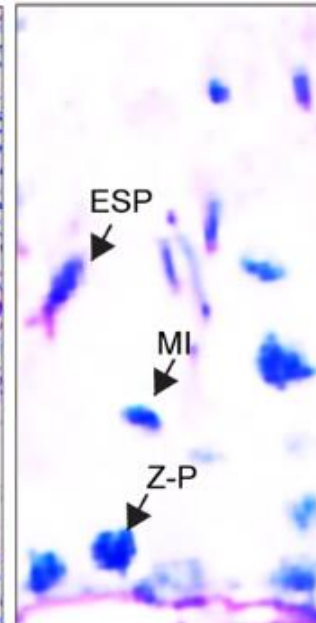

PWD-Prdm9<sup>KO/KO</sup>

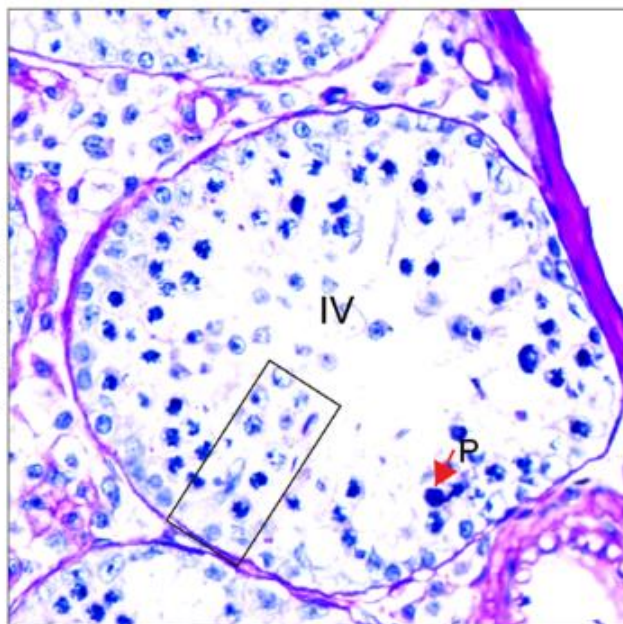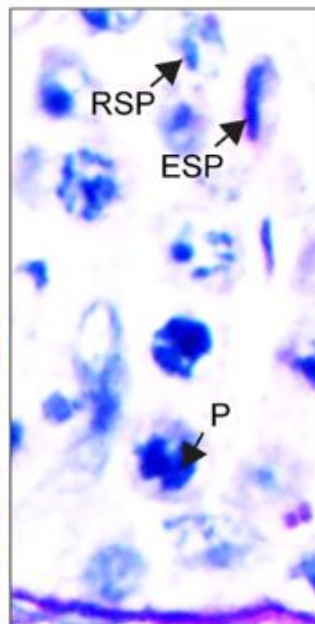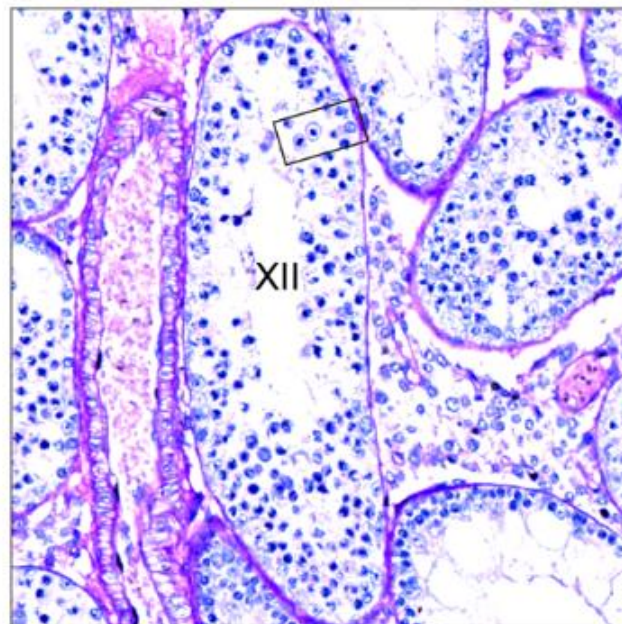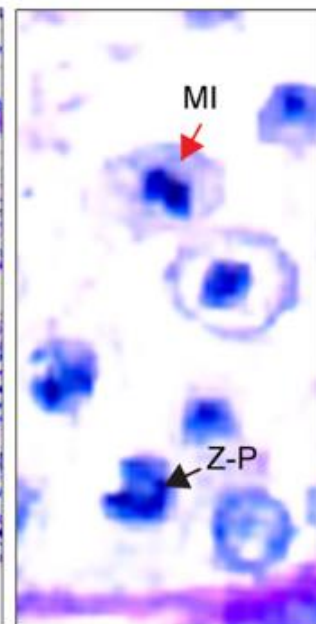

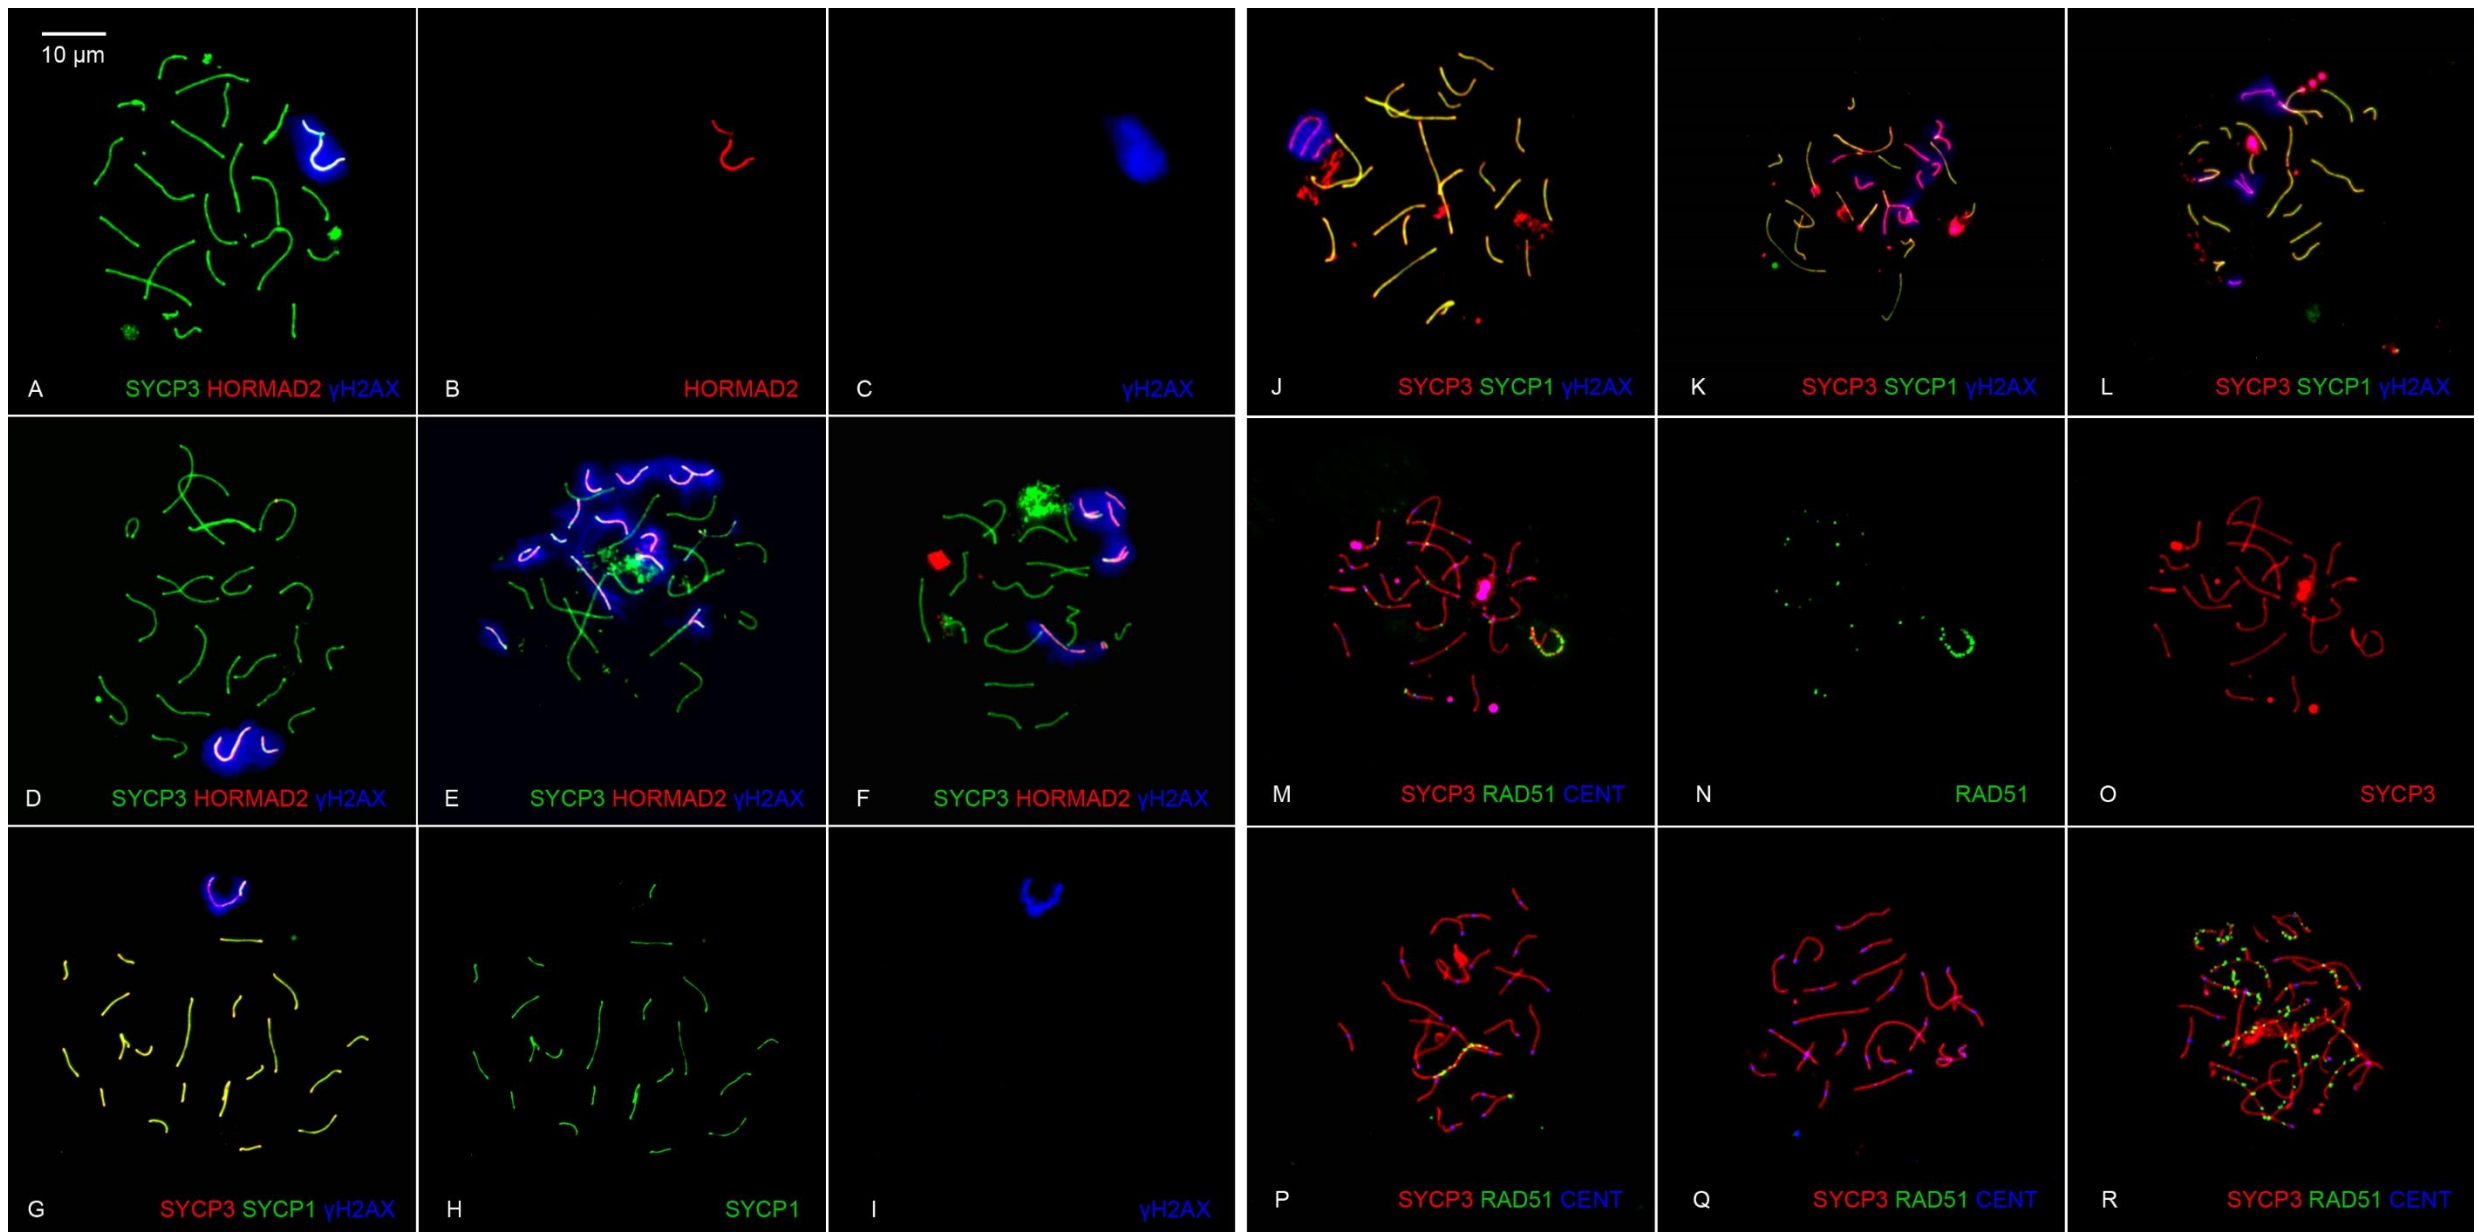

Supplemental Fig. S6

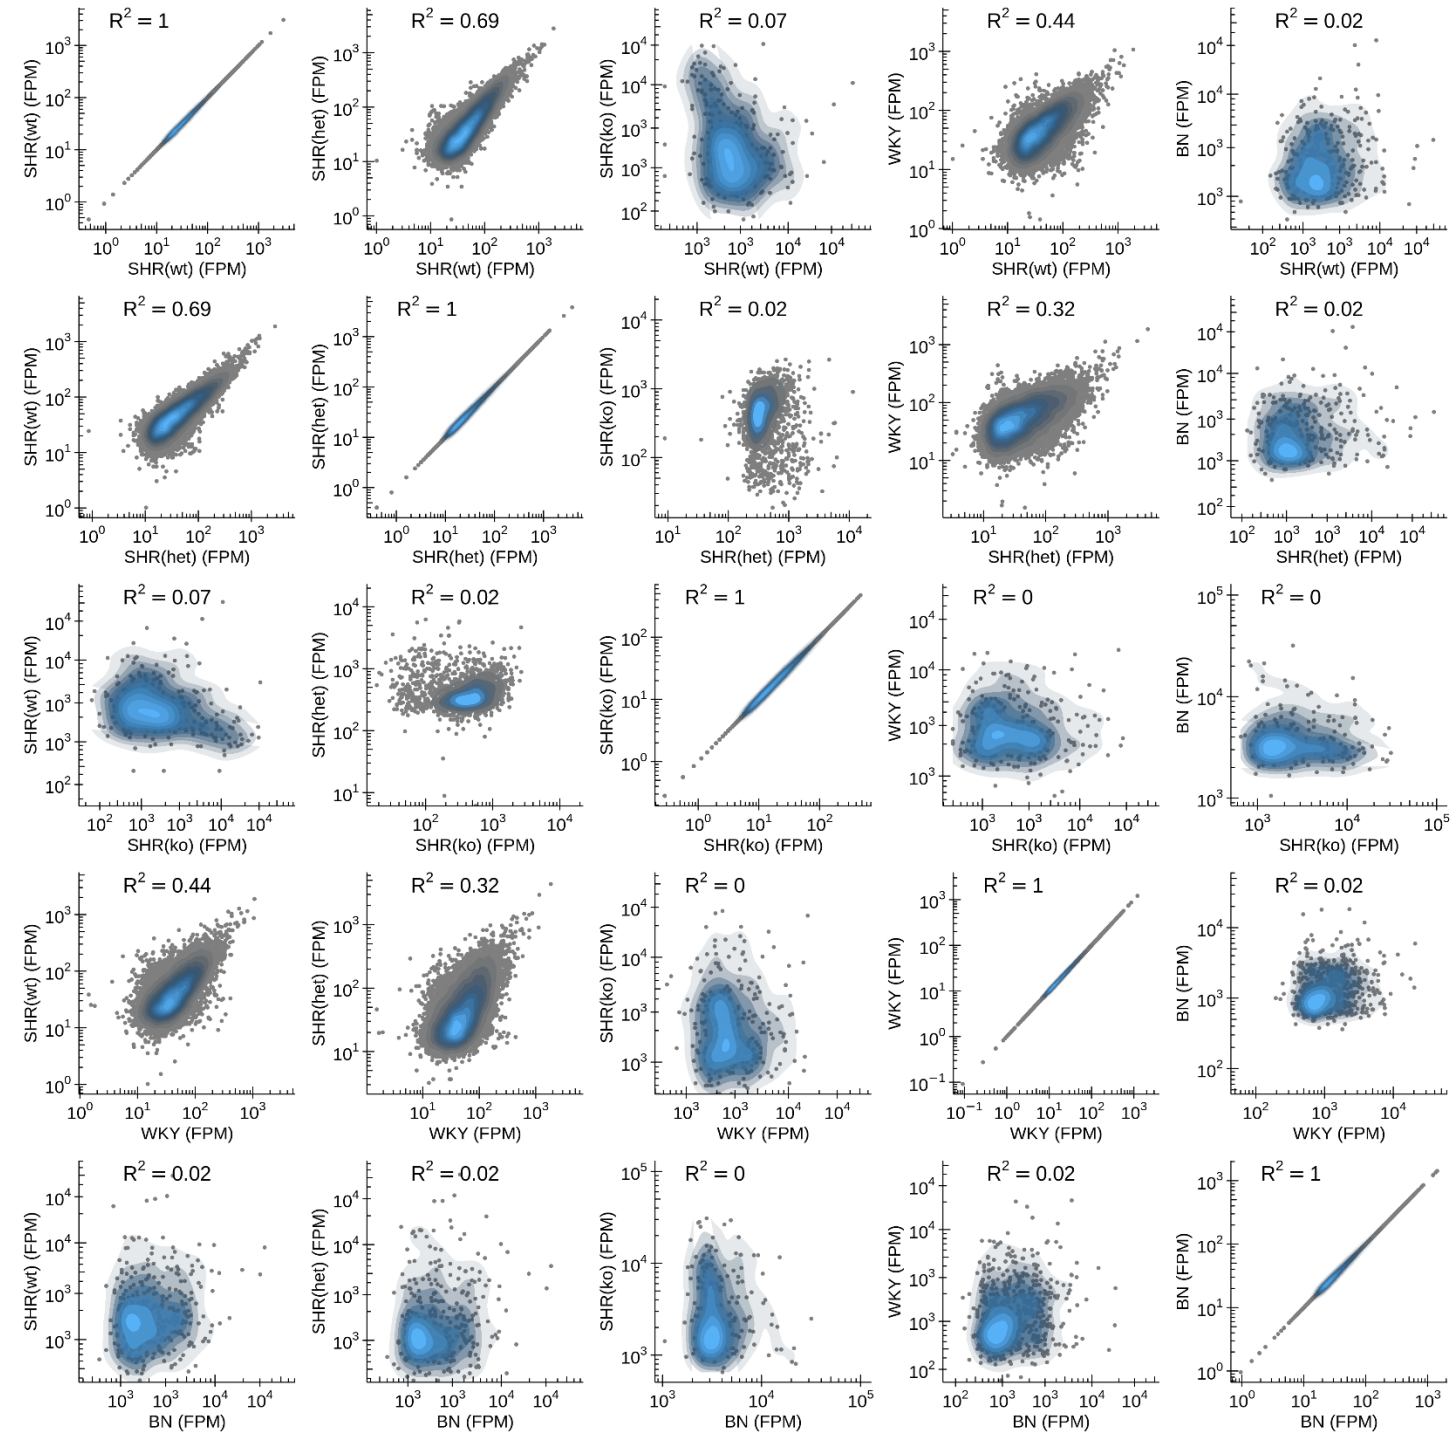

Supplemental Fig. S7

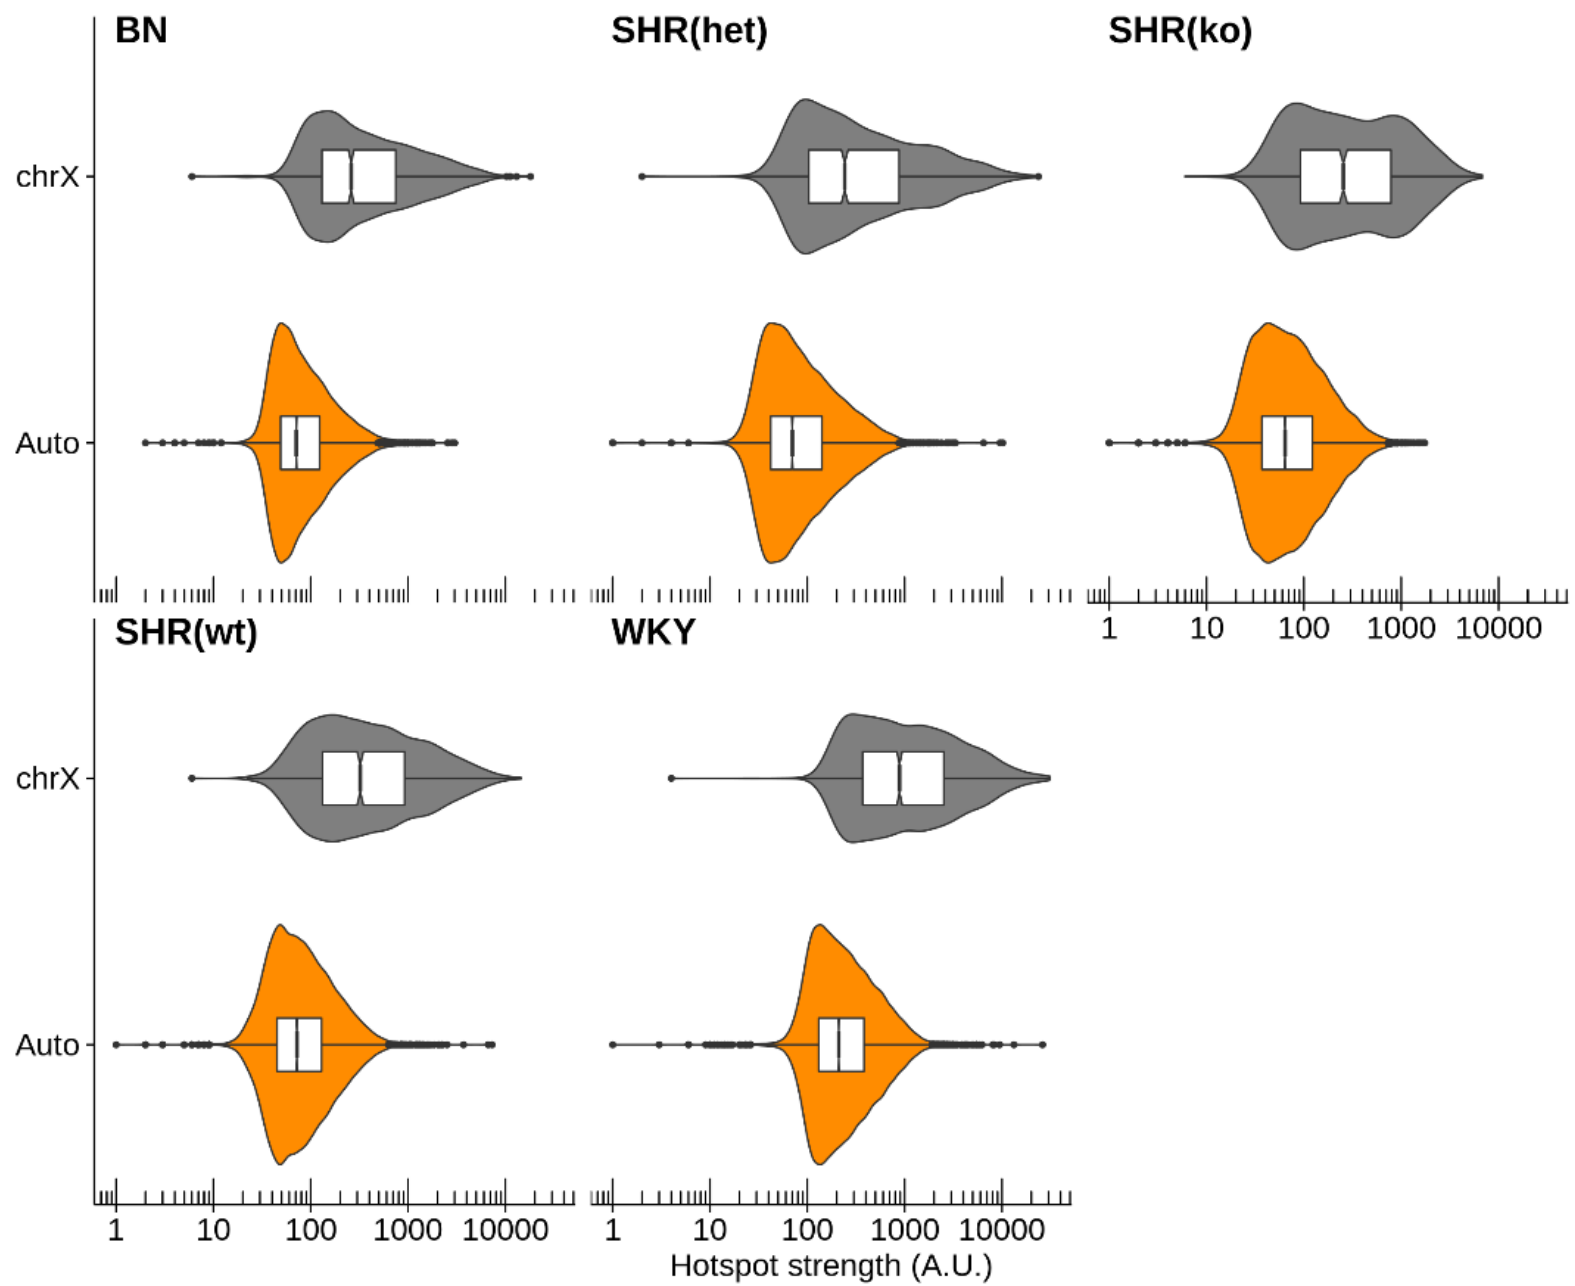

Supplemental Fig. S8
